# Supplementary material for: Resilience of the slow component in timescale-separated synchronized oscillators
Source: Frontiers journal article supplement (doi:10.3389/fnetp.2024.1399352), 2024-06-19
Supplement: Presentation_1.pdf [file Presentation_1.pdf]

# Supplementary Material for: Resilience of the slow component in timescale separated synchronized oscillators

Melvyn Tyloo

*Theoretical Division and Center for Nonlinear Studies (CNLS),  
Los Alamos National Laboratory, Los Alamos, NM 87545, USA*

(Dated: May 10, 2024)

## Appendix A: Overview of Mori-Zwanzig formalism

The idea behind the Mori-Zwanzig formalism is to obtain the time-evolution of the resolved variables in the system, which represents only a subset of the total variables. Let us consider, as an example, the following linear system,

$$\dot{\mathbf{x}} = \mathbf{A}\mathbf{x}, \quad (\text{A1})$$

where the variables are separated into a resolved  $\mathbf{x}_{\text{res}}$ , and an unresolved part  $\mathbf{x}_{\text{unr}}$  as,  $\mathbf{x} = (\mathbf{x}_{\text{res}}, \mathbf{x}_{\text{unr}})^\top$ , such that,

$$\begin{bmatrix} \dot{\mathbf{x}}_{\text{res}} \\ \dot{\mathbf{x}}_{\text{unr}} \end{bmatrix} = \begin{bmatrix} \mathbf{A}_{11} & \mathbf{A}_{12} \\ \mathbf{A}_{21} & \mathbf{A}_{22} \end{bmatrix} \begin{bmatrix} \mathbf{x}_{\text{res}} \\ \mathbf{x}_{\text{unr}} \end{bmatrix}. \quad (\text{A2})$$

One can then write the unresolved part as,

$$\mathbf{x}_{\text{unr}}(t) = e^{\mathbf{A}_{22}t} \mathbf{x}_{\text{unr}}^{(0)} + \int_0^t e^{\mathbf{A}_{22}(t-t')} \mathbf{A}_{21} \mathbf{x}_{\text{res}}(t') dt', \quad (\text{A3})$$

where  $\mathbf{x}_{\text{unr}}^{(0)}$  denotes the initial condition. Then, to obtain the time-evolution of the resolved variables, one can plug Eq. (A3) into the first row of Eq. (A2), such that,

$$\dot{\mathbf{x}}_{\text{res}}(t) = \mathbf{A}_{11} \mathbf{x}_{\text{res}}(t) + \mathbf{f}(t) + \int_0^t \mathbf{K}(t-t') \mathbf{x}_{\text{res}}(t') dt', \quad (\text{A4})$$

where  $\mathbf{f}(t) = \mathbf{A}_{12} e^{\mathbf{A}_{22}t} \mathbf{x}_{\text{unr}}^{(0)}$  and  $\mathbf{K}(t-t') = \mathbf{A}_{12} e^{\mathbf{A}_{22}(t-t')} \mathbf{A}_{21}$ . In the situation considered in the main text, the memory kernel  $\mathbf{K}(t-t')$  can be written down explicitly. Moreover, using the timescale separation, one can also calculate the integral. A good introduction is given in [1].

## Appendix B: Convergence to a Dirac- $\delta$ distribution

To obtain Eq. (7) from Eq. (6), we let  $\epsilon \rightarrow 0$ . Doing so, a Dirac- $\delta$  appears in Eq. (6) as,

$$\begin{aligned} \lim_{\epsilon \rightarrow 0} \int_0^t \epsilon^{-1} e^{-ct'/\epsilon} f(t') dt' &= \\ \lim_{\epsilon \rightarrow 0} [-e^{-ct/\epsilon} f(t) + f(0)] c^{-1} + \int_0^t \lim_{\epsilon \rightarrow 0} e^{-ct'/\epsilon} f'(t') c^{-1} dt' &= \\ = f(0) c^{-1}, \end{aligned} \quad (\text{B1})$$

where  $c > 0$  and we used an integration by parts in the first equality and the dominated convergence theorem. Using this equality, one recovers the result of Eq. (7).

## Appendix C: Details to obtain Eq. (10)

One can calculate the long-time limit of the variance of the deviations  $x_i$  from the synchronized state using the part of Eq. (9) that is orthogonal to  $\mathbf{u}_1$ . One then has,

$$\langle x_i^2 \rangle = \lim_{t \rightarrow \infty} \sum_{\alpha, \beta=2}^{N_S} \langle c_\alpha c_\beta \rangle u_{\alpha,i} u_{\beta,i} \quad (\text{C1})$$

$$\begin{aligned} &= \lim_{t \rightarrow \infty} \sum_{\alpha, \beta=2}^{N_S} \int_0^t \int_0^t dt_1 dt_2 e^{\lambda_\alpha(t-t_1)} e^{\lambda_\beta(t-t_2)} \\ &\quad \times \sum_{j,k=1}^{N_S} \langle \xi_j(t_1) \xi_k(t_2) \rangle u_{\alpha,j} u_{\beta,k} u_{\alpha,i} u_{\beta,i}. \end{aligned} \quad (\text{C2})$$

The two-point correlator of the noise satisfies  $\langle \xi_j(t_1) \xi_k(t_2) \rangle = \eta_0^2 \delta_{jk} \exp(-|t_1 - t_2|/\tau_S) + \eta_0^2 [\mathbf{J}_{\mathcal{SF}} \mathbf{J}_{\mathcal{FF}}^{-2} \mathbf{J}_{\mathcal{FS}}]_{jk} \exp(-|t_1 - t_2|/\tau_{\mathcal{F}})$ . Using the latter relation and after some algebra, one obtains the variance in the slow component Eq. (10).

## Appendix D: No timescale separation

One can also calculate the variance of the oscillators belonging to  $\mathcal{S}$  (and also  $\mathcal{F}$ ) when there is no timescale separation. Assuming as previously that the oscillators in  $\mathcal{S}$  and  $\mathcal{F}$  are subject to noises with correlation times  $\tau_S$  and  $\tau_{\mathcal{F}}$  respectively, and that the standard deviations are homogeneous, one has,

$$\begin{aligned} \langle x_i^2 \rangle &= \eta_0^2 \sum_{\alpha, \beta=2}^{N_S+N_{\mathcal{F}}} \sum_{j \in \mathcal{S}} \frac{(\gamma_\alpha + \gamma_\beta - 2\tau_S^{-1}) q_{\alpha,j} q_{\beta,j} q_{\alpha,i} q_{\beta,i}}{(\gamma_\alpha + \gamma_\beta)(\tau_S^{-1} - \gamma_\alpha)(\tau_S^{-1} - \gamma_\beta)} \\ &\quad + \eta_0^2 \sum_{\alpha, \beta=2}^{N_S+N_{\mathcal{F}}} \sum_{j \in \mathcal{F}} \frac{(\gamma_\alpha + \gamma_\beta - 2\tau_{\mathcal{F}}^{-1}) q_{\alpha,j} q_{\beta,j} q_{\alpha,i} q_{\beta,i}}{(\gamma_\alpha + \gamma_\beta)(\tau_{\mathcal{F}}^{-1} - \gamma_\alpha)(\tau_{\mathcal{F}}^{-1} - \gamma_\beta)}, \end{aligned} \quad (\text{D1})$$

for  $i = 1, \dots, N$ , where  $\mathbf{q}_\alpha$  are the eigenvectors of the Jacobian Eq. (5), with corresponding eigenvalues  $\gamma_\alpha$ .

- 
- [1] F. Caravelli and Y. T. Lin, arXiv preprint arXiv:2308.13653 (2023).
